# Supplementary material
Source: HighWire-hosted journal article supplement (https://cmaj.ca/highwire/filestream/59596/field_highwire_adjunct_files/6/150771-res-Appendix_5.pdf)
Supplement: 150771-res-Appendix_5.pdf [file 150771-res-Appendix_5.pdf]

**Appendix 5 (as supplied by the authors): Subgroup analysis of Risk of All-cause death Among Patients Using ARBs and ACEIs**

| <b>Characteristic</b>                   | <b>Hazard Ratio*<br/>(95% CI)</b> | <b>P Value</b> | <b>Interaction<br/>P Value</b> |
|-----------------------------------------|-----------------------------------|----------------|--------------------------------|
| <b>Gender</b>                           |                                   |                |                                |
| Male                                    | 0.935 (0.851-1.027)               | 0.2            | 0.9                            |
| Female                                  | 0.926 (0.827-1.038)               | 0.2            |                                |
| <b>Age</b>                              |                                   |                |                                |
| 20-64 years                             | 0.979 (0.887-1.081)               | 0.7            | 0.2                            |
| ≥ 65 years                              | 0.881 (0.792-0.980)               | 0.02           |                                |
| <b>Charlson Comorbidity Index score</b> |                                   |                |                                |
| 2                                       | 1.033 (0.891-1.197)               | 0.7            | 0.1                            |
| 3                                       | 0.992 (0.836-1.176)               | 0.9            |                                |
| 4                                       | 0.785 (0.656-0.940)               | 0.008          |                                |
| ≥ 5                                     | 0.924 (0.825-1.034)               | 0.2            |                                |
| <b>Hypertension</b>                     |                                   |                |                                |
| Yes                                     | 0.932 (0.865-1.005)               | 0.07           | 0.7                            |
| No                                      | 0.982 (0.752-1.283)               | 0.9            |                                |
| <b>Chronic kidney disease</b>           |                                   |                |                                |
| Yes                                     | 0.951 (0.825-1.096)               | 0.5            | 0.9                            |
| No                                      | 0.932 (0.856-1.014)               | 0.1            |                                |
| <b>Heart failure</b>                    |                                   |                |                                |
| Yes                                     | 0.799 (0.677-0.944)               | 0.008          | 0.04                           |
| No                                      | 0.968 (0.893-1.049)               | 0.4            |                                |
| <b>Coronary artery disease</b>          |                                   |                |                                |
| Yes                                     | 0.901 (0.799-1.016)               | 0.09           | 0.4                            |
| No                                      | 0.958 (0.874-1.049)               | 0.4            |                                |

\* Adjusted for propensity score; ACEI cohort: reference group

Abbreviations: CI, confidence interval; ARBs, Angiotensin II receptor blockers; ACEIs, angiotensin-converting-enzyme inhibitors.
